# Supplementary material for: Automatic discovery of 100-miRNA signature for cancer classification using ensemble feature selection
Source: PubMed Central journal article supplement (PMC6751684; doi:10.1186/s12859-019-3050-8), 2019-09-18
Supplement: 12859_2019_3050_MOESM1_ESM.pdf [file 12859_2019_3050_MOESM1_ESM.pdf]

## Supplementary Data

### Annex A

List of the top 100 most relevant features identified by the proposed methodology, in order of importance:

|              |                |                |                |
|--------------|----------------|----------------|----------------|
| hsa-mir-10b  | hsa-mir-19a    | hsa-mir-30e    | hsa-mir-1228   |
| hsa-mir-126  | hsa-mir-106a   | hsa-mir-7-3    | hsa-mir-146b   |
| hsa-mir-10a  | hsa-mir-200b   | hsa-mir-885    | hsa-mir-15a    |
| hsa-mir-122  | hsa-mir-99a    | hsa-mir-152    | hsa-let-7g     |
| hsa-mir-143  | hsa-mir-199b   | hsa-mir-211    | hsa-mir-148a   |
| hsa-mir-21   | hsa-let-7b     | hsa-mir-135a-2 | hsa-mir-182    |
| hsa-mir-30a  | hsa-let-7f-1   | hsa-mir-194-2  | hsa-mir-196a-1 |
| hsa-mir-9-1  | hsa-mir-135a-1 | hsa-mir-30b    | hsa-mir-199a-2 |
| hsa-mir-9-2  | hsa-mir-146a   | hsa-mir-378    | hsa-mir-374b   |
| hsa-mir-125a | hsa-mir-22     | hsa-mir-181b-1 | hsa-mir-424    |
| hsa-let-7i   | hsa-mir-28     | hsa-mir-183    | hsa-let-7d     |
| hsa-mir-934  | hsa-mir-503    | hsa-mir-23a    | hsa-mir-944    |
| hsa-mir-145  | hsa-mir-584    | hsa-mir-202    | hsa-mir-203    |
| hsa-mir-190b | hsa-mir-210    | hsa-mir-3678   | hsa-mir-217    |
| hsa-mir-196b | hsa-mir-95     | hsa-mir-194-1  | hsa-mir-328    |
| hsa-mir-200c | hsa-mir-137    | hsa-mir-204    | hsa-mir-3613   |
| hsa-mir-205  | hsa-mir-200a   | hsa-mir-34a    | hsa-mir-124-2  |
| hsa-mir-375  | hsa-mir-103-1  | hsa-mir-155    | hsa-mir-124-3  |
| hsa-let-7c   | hsa-mir-1-2    | hsa-mir-708    | hsa-mir-1277   |
| hsa-mir-490  | hsa-mir-101-2  | hsa-mir-1245   | hsa-mir-139    |
| hsa-mir-193a | hsa-mir-125b-1 | hsa-mir-874    | hsa-mir-190    |
| hsa-mir-30d  | hsa-mir-130a   | hsa-mir-199a-1 | hsa-mir-29b-1  |
| hsa-mir-1247 | hsa-mir-142    | hsa-mir-221    | hsa-mir-30c-2  |
| hsa-mir-135b | hsa-mir-192    | hsa-mir-27b    | hsa-let-7f-2   |
| hsa-mir-141  | hsa-mir-29c    | hsa-mir-340    | hsa-mir-124-1  |

# Annex B

**Table 1.** Table comparing the top 50 most frequent features extracted by the machine learning algorithms with existing biomarkers references in literature either in stem-loop or mature sequence. **BRCA** Breast Cancer, **CRC** Colorectal Cancer, **LC** Lung Cancer, **PAAD** Pancreatic Cancer, **OV** Ovarian Cancer, **ESCA** esophageal squamous cell carcinoma, **HC** Hematological Cancer, **DLBC** Diffuse large B-cell lymphoma, **OSCC** oral squamous cell carcinoma, **MM** Multiple myeloma, **NPC** Nasopharyngeal cancer, **HNSC** neck squamous cell carcinoma, **OS** Osteosarcoma, **CHOL** Cholangiocarcinoma, **UT** Urinary tract, **GBM** Glioblastoma, **CNSL** Central nervous system lymphoma, **MA** Melanoma, **PE** Pleural effusion, **PB** Peripheral Blood, **PJ** Paecreatic Juice.

| miRNAs     | Plasma                                                                                                                         | Serum                                                                                                                                                                  | Urine     | Blood                                          | Sputum                   | Saliva              | Stool     | PE                   | PJ                  |
|------------|--------------------------------------------------------------------------------------------------------------------------------|------------------------------------------------------------------------------------------------------------------------------------------------------------------------|-----------|------------------------------------------------|--------------------------|---------------------|-----------|----------------------|---------------------|
| miR-10b    | BRCA [1] [2], CRC [1], PAAD [1],                                                                                               | BRCA [1], LC [1],                                                                                                                                                      |           |                                                |                          |                     |           |                      |                     |
| miR-126    | BRCA [1], LC [1] [2],                                                                                                          | BRCA [1],                                                                                                                                                              |           | BLCA [3], LC [3], OV [3],                      | LC [3],                  |                     |           |                      |                     |
| miR-10a    | LC [1],                                                                                                                        |                                                                                                                                                                        |           | BRCA [1], ESCA [3],                            |                          |                     |           |                      |                     |
|            |                                                                                                                                | HC [2],                                                                                                                                                                |           |                                                |                          |                     |           |                      |                     |
| miR-122    | GC [1] [2], HCC [1],                                                                                                           | HCC [1], Liver [2],                                                                                                                                                    |           | CRC [1],                                       |                          |                     |           |                      |                     |
| miR-143    | CRC [1], PAAD [1],                                                                                                             | HCC [1], BRCA [1], PCA [1],                                                                                                                                            |           | GC [3],                                        |                          |                     |           |                      |                     |
| miR-21     | CHOL [4], BRCA [1] [4], CRC [1],<br>HL [4], Liver [2], LC [1] [4] [2],<br>ESCA [4], OS [4], PAAD [1] [4],<br>HC [2], Neck [1], | BRCA [1] [4] [2], CNSL [4],<br>HC [2], HCC [1], Liver [4] [2],<br>PCA [1] [4] [2], GBM [4], PAAD [1] [4],<br>PCA [4], LC [1] [4] [2], OV [4],<br>DLBC [4], GC [1] [4], | BRCA [4], | BRCA [3], DLBC [3],<br>LC [3], OV [3],         | LC [3],<br>LC [4](BAL+), | ESCA [4], PAAD [4], | PAAD [4], |                      |                     |
|            | PCA [1] [4], HCC [1], MA [4],<br>GC [1] [4] [2], GBM [4], NPCA [4],                                                            | CRC [1] [4] [2],                                                                                                                                                       |           | GC [3] [2],                                    | GC [1](PB),              |                     |           |                      |                     |
| miR-30a    | BRCA [1] [2], LC [4],                                                                                                          | ESCA [4](Exo),                                                                                                                                                         |           | BRCA [1],                                      |                          |                     |           |                      |                     |
| miR-1      | LC [1],                                                                                                                        |                                                                                                                                                                        |           |                                                |                          |                     |           |                      |                     |
| miR-9-1    |                                                                                                                                | PCA [5]                                                                                                                                                                |           |                                                |                          |                     |           |                      |                     |
| miR-9-2    |                                                                                                                                | PCA [5]                                                                                                                                                                |           |                                                |                          |                     |           |                      |                     |
| miR-125a   |                                                                                                                                | LC [4], BRCA [4], Liver [4],                                                                                                                                           |           |                                                |                          | OSCC [3], Oral [4], |           |                      |                     |
| let-7i     | PAAD [1], OV [4],                                                                                                              | BRCA [1], GC [4], LC [4], OV [4],                                                                                                                                      |           |                                                |                          |                     |           |                      |                     |
| miR-934    |                                                                                                                                |                                                                                                                                                                        |           | BRCA [6], PCA [6]                              |                          |                     |           |                      |                     |
| miR-145    | BRCA [1] [2], CRC [1], LC [1], PCA [1],                                                                                        | BRCA [1] [2], CRC [2], LC [1],                                                                                                                                         |           | BRCA [1],                                      | LC [3],                  |                     |           |                      |                     |
| miR-190b   | LC [1],                                                                                                                        |                                                                                                                                                                        |           | LC [1],                                        |                          |                     |           |                      |                     |
| miR-190b   |                                                                                                                                | PAAD [1],                                                                                                                                                              |           |                                                |                          |                     |           |                      |                     |
| miR-200c   | BRCA [1], CRC [1] [4],                                                                                                         | CRC [1] [4] [2], ESCA [4], GC [4],<br>LC [4], OV [4], PAAD [1], PCA [1] [2],<br>OV [4](Exo),                                                                           |           | BRCA [4], BRCA [1],<br>OV [3], GC [1] [4] [2], |                          |                     |           |                      |                     |
| miR-205    | LC [2],                                                                                                                        | BRCA [1], LC [1] [2],                                                                                                                                                  |           | OV [3],                                        | LC [3],                  |                     |           | PAAD [1],            |                     |
| miR-375    | CRC [4], LC [1] [4], ESCA [4],<br>PAAD [1], PCA [1] [4],                                                                       | BRCA [4], GC [1] [2], Liver [4] [2],<br>LC [4], ESCA [4],                                                                                                              | PCA [2],  | PCA [3],                                       | LC [3],                  |                     |           |                      |                     |
| let-7c     | LC [4], PCA [1],                                                                                                               | BRCA [4], GC [4],                                                                                                                                                      |           | BRCA [3], MA [3],                              |                          |                     |           |                      |                     |
| miR-490    | MM [7]                                                                                                                         |                                                                                                                                                                        |           |                                                |                          |                     |           |                      |                     |
| miR-193a   |                                                                                                                                | BRCA [1], CRC [1] [2],                                                                                                                                                 |           |                                                |                          |                     |           |                      |                     |
| miR-30d    |                                                                                                                                | LC [1] [4] [2],                                                                                                                                                        |           | LC [3],                                        |                          | GC [3], LC [3],     |           |                      |                     |
| miR-1247   |                                                                                                                                |                                                                                                                                                                        |           |                                                |                          |                     |           | PAAD [8]             |                     |
| miR-135b   | CRC [5]                                                                                                                        |                                                                                                                                                                        |           |                                                |                          |                     |           |                      |                     |
| miR-141    | CRC [4] [2], PAAD [1], PCA [1],<br>PCA [4](Ves),                                                                               | LC [1] [4], OV [4], PCA [1] [4] [2], UT [4],<br>OV [4](Exo), PCA [4](Exo),                                                                                             | PCA [2],  | BRCA [4], OV [3], PCA [3],                     |                          |                     |           |                      |                     |
| miR-19a    | BLCA [4], CRC [1], LC [1] [2], MA [4],                                                                                         | BRCA [4], CRC [4], LC [4], MM [4],                                                                                                                                     |           |                                                |                          |                     |           |                      |                     |
| miR-106a   | CRC [4], GC [1] [4] [2], PAAD [1],                                                                                             | CRC [4], LC [1] [2],                                                                                                                                                   |           | GC [3], GC [1](PB),                            |                          |                     |           | CRC [4],             |                     |
| miR-200b   | PCA [4],                                                                                                                       | OV [4], PAAD [1], PCA [4], OV [4](Exo),                                                                                                                                |           | OV [3], PAAD [3],                              | LC [3],                  |                     |           |                      |                     |
|            | LC [1],                                                                                                                        |                                                                                                                                                                        |           |                                                |                          |                     |           |                      |                     |
| miR-99a    |                                                                                                                                | PAAD [1],                                                                                                                                                              |           |                                                |                          |                     |           |                      |                     |
| miR-190b   |                                                                                                                                | UT [9]                                                                                                                                                                 |           |                                                |                          |                     |           |                      |                     |
| let-7b     | BRCA [2], LC [4],                                                                                                              | BRCA [1], HCC [4], LC [4], OV [4],                                                                                                                                     |           |                                                |                          |                     |           |                      |                     |
| let-7f1    | LC [1] [2], OV [4], LC [4](Ves),                                                                                               | GC [4], HCC [4], Liver [2],                                                                                                                                            |           | LC [1],                                        |                          |                     |           | CRC [4],<br>CRC [10] |                     |
| miR-135a-1 |                                                                                                                                |                                                                                                                                                                        |           |                                                |                          |                     |           |                      |                     |
| miR-146a   |                                                                                                                                | PAAD [1],                                                                                                                                                              |           |                                                |                          |                     |           |                      |                     |
| miR-22     | PAAD [1],                                                                                                                      | PAAD [1],                                                                                                                                                              |           | LC [1], ESCA [3],                              |                          |                     |           | LC [1],              |                     |
| miR-28     |                                                                                                                                | LC [5]                                                                                                                                                                 |           |                                                |                          |                     |           |                      |                     |
| miR-503    | GC [1]                                                                                                                         |                                                                                                                                                                        |           |                                                |                          |                     |           |                      |                     |
| miR-584    | LC [12]                                                                                                                        |                                                                                                                                                                        |           |                                                |                          |                     |           |                      |                     |
| miR-210    | BRCA [1] [4], LC [1] [2], PAAD [1] [4],                                                                                        | BLCA [4], BRCA [1], DLBC [4],<br>HC [2], Liver [4], PAAD [1], PCA [1] [2],<br>Renal [4], Glioma [4],                                                                   | BLCA [4], | DLBC [3], PAAD [3],                            | LC [3],                  | PAAD [4],           |           |                      | PAAD [4], PAAD [1], |
| miR-95     | CRC [5]                                                                                                                        |                                                                                                                                                                        |           |                                                |                          |                     |           |                      |                     |
| miR-137    | HNSC [13]                                                                                                                      |                                                                                                                                                                        |           |                                                |                          |                     |           |                      |                     |
| miR-200a   |                                                                                                                                | PCA [1], PAAD [1]                                                                                                                                                      |           |                                                |                          |                     |           |                      |                     |
| miR-103-1  |                                                                                                                                | BLCA [1]                                                                                                                                                               |           |                                                |                          |                     |           |                      |                     |
| miR-1-2    |                                                                                                                                | BRCA [1], HCC [1]                                                                                                                                                      |           |                                                |                          |                     |           |                      |                     |
| miR-101-2  |                                                                                                                                | BRCA [1] [2], HCC [1], Liver [2],                                                                                                                                      |           |                                                |                          |                     |           |                      |                     |
| miR-125b-1 |                                                                                                                                | LC [1], BRCA [1], PCA [1]                                                                                                                                              |           |                                                |                          |                     |           |                      |                     |
| miR-130a   |                                                                                                                                |                                                                                                                                                                        |           | CRC [1]                                        |                          |                     |           |                      |                     |
| miR-142    | CRC [1]                                                                                                                        |                                                                                                                                                                        |           |                                                |                          |                     |           |                      |                     |
| miR-192    | GC [1] [2], CRC [1], HCC [1],                                                                                                  |                                                                                                                                                                        |           |                                                |                          |                     |           |                      |                     |
| miR-29c    |                                                                                                                                | CRC [1] [4] [2], LC [1] [4] [2], NPCA [4],<br>OS [4],                                                                                                                  |           |                                                |                          |                     |           |                      |                     |

# Annex C

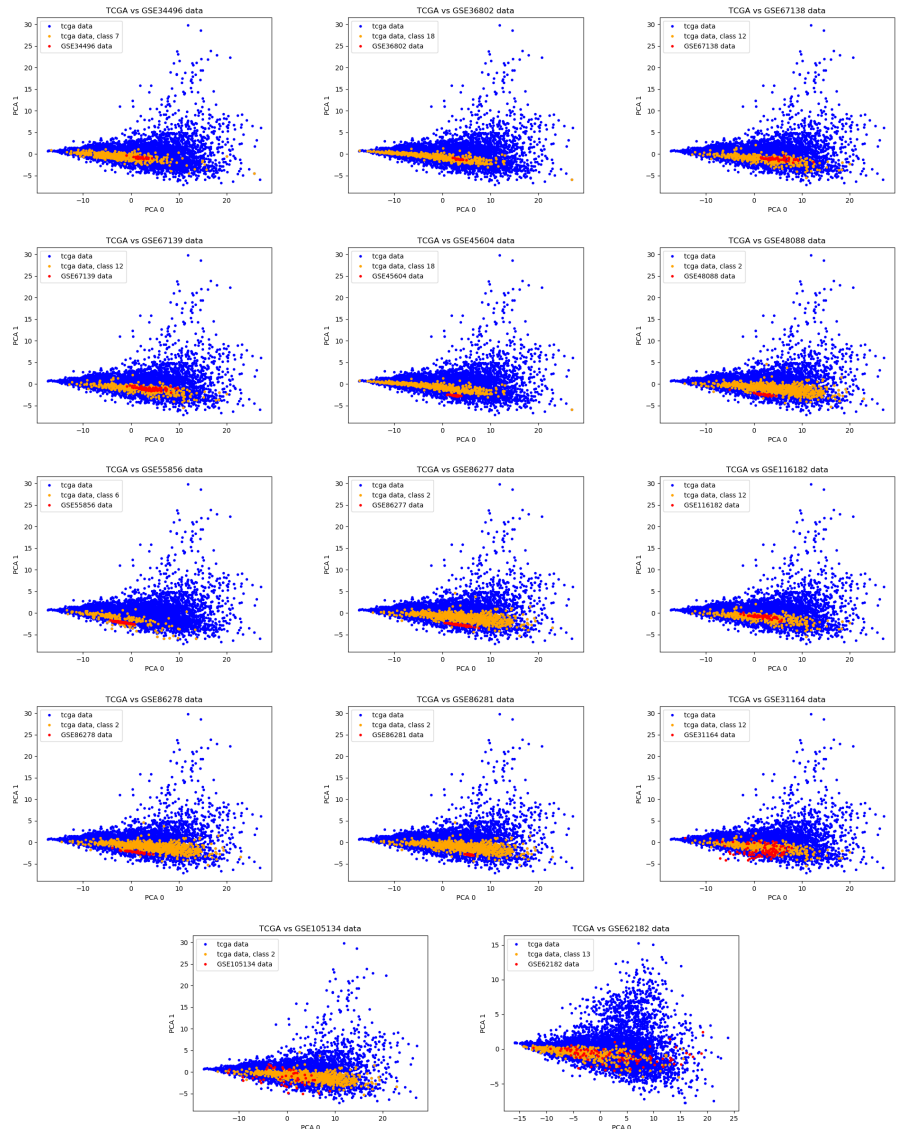

**Fig 1.** PCA projections of GEO datasets transformed into the TCGA dataset space. Orange data points represent samples from the target class from the TCGA dataset, the blue data points are other samples in TCGA, and the red points are the projected samples from GEO datasets.

## Annex D

Classifiers are supervised machine learning algorithms that are able to learn how to separate samples in classes, based on the values of their features. Classifiers implicitly learn the properties of classes starting from training data, that is, a dataset containing samples already associated to their respective class. Once trained, classifiers are in principle able to generalize, and associate unseen samples to known classes.

A popular measurement used to assess the quality of a classifier is termed *accuracy*. Basically, given a dataset for which the correct assignment of samples to classes is known, accuracy measures the percentage of times that a classifier is correct in predicting the class of a sample, comparing the prediction to its known class.

In order to properly assess the generalization ability of a classifier, it is essential to test it properly, as most machine learning algorithms tend to overfit the training data, that is, learning relationships that only exist in the training data, and thus generalize poorly. The basic methodology for testing a classifier is to separate all available labeled data into a training and a test set, train the classifier on the training set, and then test it on the test set, evaluating the final accuracy.

A more refined approach is a *k-fold cross-validation*: the available data is randomly split into  $k$  parts, called *folds*. The following procedure is repeated for  $k$  iterations: at iteration  $i$ , the classifier is trained on all available folds except the  $i$ -th, and then tested on the  $i$ -th. The accuracy for each fold is stored, and ultimately averaged over all folds, thus providing the user with a more rigorous assessment of the classifier's appropriateness to the current problem.

## References

1. He Y, Lin J, Kong D, Huang M, Xu C, Kim TK, et al. Current state of circulating microRNAs as cancer biomarkers. *Clinical chemistry*. 2015; p. clinchem-2015.
2. Cheng G. Circulating miRNAs: roles in cancer diagnosis, prognosis and therapy. *Advanced drug delivery reviews*. 2015;81:75–93.
3. Calore F, Lovat F, Garofalo M. Non-coding RNAs and cancer. *International journal of molecular sciences*. 2013;14(8):17085–17110.
4. Larrea E, Sole C, Manterola L, Goicoechea I, Armesto M, Arestin M, et al. New concepts in cancer biomarkers: circulating miRNAs in liquid biopsies. *International journal of molecular sciences*. 2016;17(5):627.
5. Wang J, Zhang KY, Liu SM, Sen S. Tumor-associated circulating microRNAs as biomarkers of cancer. *Molecules*. 2014;19(2):1912–1938.
6. Zhao H, Shen J, Hu Q, Davis W, Medico L, Wang D, et al.. Effects of preanalytic variables on circulating microRNAs in whole blood; 2014.
7. Jiang Y, Luan Y, Chang H, Chen G. The diagnostic and prognostic value of plasma microRNA-125b-5p in patients with multiple myeloma. *Oncology letters*. 2018;16(3):4001–4007.
8. Wang J, Raimondo M, Guha S, Chen J, Diao L, Dong X, et al. Circulating microRNAs in pancreatic juice as candidate biomarkers of pancreatic cancer. *Journal of Cancer*. 2014;5(8):696.

9. Montalbo R, Izquierdo L, Ingelmo-Torres M, Lozano JJ, Capitán D, Alcaraz A, et al. Prognostic value of circulating microRNAs in upper tract urinary carcinoma. *Oncotarget*. 2018;9(24):16691.
10. Koga Y, Yasunaga M, Takahashi A, Kuroda J, Moriya Y, Akasu T, et al. MicroRNA expression profiling of exfoliated colonocytes isolated from feces for colorectal cancer screening. *Cancer prevention research*. 2010; p. 1940–6207.
11. Shin VY, Ng EK, Chan VW, Kwong A, Chu KM. A three-miRNA signature as promising non-invasive diagnostic marker for gastric cancer. *Molecular cancer*. 2015;14(1):202.
12. Wang H, Peng R, Wang J, Qin Z, Xue L. Circulating microRNAs as potential cancer biomarkers: the advantage and disadvantage. *Clinical epigenetics*. 2018;10(1):59.
13. Hsu CM, Lin PM, Wang YM, Chen ZJ, Lin SF, Yang MY. Circulating miRNA is a novel marker for head and neck squamous cell carcinoma. *Tumor Biology*. 2012;33(6):1933–1942.
14. Jiang X, Du L, Duan W, Wang R, Yan K, Wang L, et al. Serum microRNA expression signatures as novel noninvasive biomarkers for prediction and prognosis of muscle-invasive bladder cancer. *Oncotarget*. 2016;7(24):36733.
